# Supplementary material for: Fetal abdominal overgrowth is already present at 20–24 gestational weeks prior to diagnosis of gestational diabetes mellitus
Source: PubMed Central journal article supplement (PMC8664824; doi:10.1038/s41598-021-03145-7), 2021-12-10
Supplement: 41598_2021_3145_MOESM1_ESM.pdf [file 41598_2021_3145_MOESM1_ESM.pdf]

**Fetal abdominal Overgrowth is already present at 20-24 gestational weeks prior to diagnosis of gestational diabetes mellitus**

Wonjin Kim, MD<sup>1,2\*</sup>; Soo Kyung Park, MS<sup>3\*</sup>; Yoo Lee Kim, MD, PhD<sup>1</sup>

<sup>1</sup>Division of Endocrinology and Metabolism, Department of Internal Medicine, Gangnam CHA Medical Center, CHA University School of Medicine, Seoul, Korea.

<sup>2</sup>Yonsei University College of Medicine, Seoul, Korea

<sup>3</sup>Department of Biostatistics and Data Science, University of Texas Health Science Center at Houston, Houston, Texas, 77030, USA

\*: These two authors contributed equally to this work as co-first authors.

ORCID ID:

W Kim: 0000-0002-0689-4100

SK Park: 0000-0003-4708-630X

YL Kim: 0000-0002-9025-9774

Corresponding author:

Yoo Lee Kim, MD, PhD,

Division of Endocrinology and Metabolism, Department of Internal Medicine, Gangnam CHA Gangnam Medical Center, CHA University School of Medicine, 566, Nonhyeon-ro, Gangnam-gu, Seoul, 06135, Republic of Korea

Tel: +82-2-3468-3077; Fax: +82-2-3468-3565

E-mail: [ylkim@cha.ac.kr](mailto:ylkim@cha.ac.kr), [ylkim60@daum.net](mailto:ylkim60@daum.net)

Supplementary Table S1. Clinical and biochemical characteristics and pregnancy outcomes in NGT and GDM subjects with and without fetal biometry

|                                                 | NGT<br>(N=6,721)                         |                                          |         | GDM<br>(N=378)                         |                                          |         |
|-------------------------------------------------|------------------------------------------|------------------------------------------|---------|----------------------------------------|------------------------------------------|---------|
|                                                 | With fetal<br>biometry data<br>(n=6,639) | Without fetal<br>biometry data<br>(n=82) | p-value | With fetal<br>biometry data<br>(n=357) | Without fetal<br>biometry data<br>(n=21) | p-value |
|                                                 | <b>Clinical and biochemical</b>          |                                          |         |                                        |                                          |         |
| Age (years)                                     | 33.2±3.8                                 | 32.0±3.7                                 | <0.001  | 35.3±3.9                               | 34.2±3.7                                 | 0.1935  |
| Pre-pregnancy BMI (kg/m <sup>2</sup> )          | 20.6±2.6                                 | 20.5±2.6                                 | 0.7393  | 22.3±3.4                               | 21.8±4.1                                 | 0.5053  |
| Weight gain (kg)                                |                                          |                                          |         |                                        |                                          |         |
| Pre-pregnancy – At diagnosis                    | 7.5±3.25                                 | 7.5±3.8                                  | 0.7455  | 7.8±3.6                                | 8.0±3.5                                  | 0.8291  |
| Pre-pregnancy – Near term                       | 12.9±4.1                                 | 13.4±4.4                                 | 0.0296  | 11.4±4.6                               | 12.7±4.6                                 | 0.2573  |
| 50-g GCT (mmol/L)                               | 6.2±1.2                                  | 6.2±1.1                                  | 0.6712  | 9.2±1.4                                | 8.9±1.4                                  | 0.4270  |
| Fasting plasma glucose <sup>a</sup><br>(mmol/L) | 4.5±0.4                                  | 4.5±0.3                                  | 0.9708  | 5.0±0.8                                | 4.7±0.9                                  | 0.2130  |
| HbA1c at diagnosis <sup>a</sup> (%)             | 5.0±0.3                                  | 5.0±0.3                                  | 0.8635  | 5.3±0.5                                | 5.2±0.5                                  | 0.4017  |
| Fasting insulin <sup>a</sup> (pmol/L)           | 7.9±4.0                                  | 11.4±10.6                                | 0.2429  | 9.9±4.9                                | 9.6±5.5                                  | 0.7593  |
| Insulin treatment (%)                           | -                                        | -                                        |         | 10.9                                   | 4.8                                      | 0.3723  |
| <b>Pregnancy outcomes</b>                       |                                          |                                          |         |                                        |                                          |         |
| Primipara (%)                                   | 67.4                                     | 65.7                                     | 0.4910  | 66.7                                   | 66.7                                     | 1.0000  |
| Cesarean delivery (%)                           | 36.1                                     | 35.7                                     | 0.8792  | 50.1                                   | 47.1                                     | 0.8037  |

|                               |              |              |        |              |              |        |
|-------------------------------|--------------|--------------|--------|--------------|--------------|--------|
| Primary cesarean delivery (%) | 21.9         | 15.3         | 0.0024 | 31.1         | 14.3         | 0.1029 |
| Infant birth weight (gm)      | 3195.1±419.4 | 3240.4±445.9 | 0.0637 | 3224.4±516.5 | 3261.2±396.0 | 0.7726 |
| GA at delivery (weeks)        | 39.0±1.5     | 39.0±1.68    | 0.3912 | 38.4±1.8     | 38.7±0.9     | 0.4671 |
| LGA (%)                       | 5.1          | 8.0          | 0.0409 | 13.6         | 11.8         | 0.8247 |
| Macrosomia <sup>b</sup> (%)   | 1.9          | 2.9          | 0.3127 | 4.7          | 5.9          | 0.8310 |

NGT, normal glucose tolerance; GDM, gestational diabetes mellitus; BMI, body mass index; GCT, glucose challenge test; HbA1c, glycosylated hemoglobin; GA, gestational age; LGA, large for gestational age.

<sup>a</sup> Column Ns for the variable are different from the Ns presented in the table, <sup>b</sup> Infant birth weight  $\geq$  4kg

Supplementary Table S2. Odds ratios of FAO by each FAOR at 20-24 GW in NGT, total GDM, and GDM subgroups

|             | Fetal Abdominal Obesity                         |                                    |                                   |
|-------------|-------------------------------------------------|------------------------------------|-----------------------------------|
|             | Odds Ratio (95% CI)                             |                                    |                                   |
|             | GA-AC/GA-LMP <sup>b</sup> $\geq 90^{\text{th}}$ | GA-AC/GA-BPD $\geq 90^{\text{th}}$ | GA-AC/GA-FL $\geq 90^{\text{th}}$ |
| NGT         | 1 (ref.)                                        | 1 (ref.)                           | 1 (ref.)                          |
| Total GDM   | 1.496 <sup>a</sup> (1.097, 2.038)               | 1.088 (0.770, 1.538)               | 1.589 <sup>a</sup> (1.171, 2.156) |
| GDM Group 1 | 0.978 (0.549, 1.743)                            | 0.973 (0.546, 1.734)               | 1.253 (0.739, 2.126)              |
| GDM Group 2 | 1.620 (0.474, 5.544)                            | 3.915 <sup>a</sup> (1.500, 10.223) | 2.331 (0.777, 6.992)              |
| GDM Group 3 | 2.041 <sup>a</sup> (1.344, 3.098)               | 0.986 (0.575, 1.690)               | 1.637 <sup>a</sup> (1.043, 2.568) |
| GDM Group 4 | 1.312 (0.556, 3.098)                            | 0.831 (0.297, 2.319)               | 2.151 <sup>a</sup> (1.037, 4.461) |

FAO, fetal abdominal obesity; FAOR, fetal abdominal overgrowth ratio; GW, gestational weeks; GA-AC, estimated gestational age by abdominal circumference; GA-LMP, gestational age by last menstruation period; GA-BPD, estimated gestational age by biparietal diameter; GA-FL, estimated gestational age by femur length; NGT, normal glucose tolerance; GDM, gestational diabetes mellitus.

<sup>a</sup> $p < 0.05$ , <sup>b</sup>Gestational age by LMP at 20-24 GW, <sup>c</sup>Fetal abdominal overgrowth defined as fetal abdominal overgrowth ratio (FAOR)  $\geq 90^{\text{th}}$  were GA-AC/GA-LMP  $\geq 1.076$ , GA-AC/GA-BPD  $\geq 1.070$ , and GA-AC/GA-FL  $\geq 1.077$

Supplementary Table S3. Odds ratios of FAO by FAOR of GA-AC/GA-LMP  $\geq 90^{\text{th}}$  according to GW at which fetal biometry was performed.

|          | Odds ratios of FAO by FAOR $\geq 90^{\text{th}}$ |                      |
|----------|--------------------------------------------------|----------------------|
|          | NGT                                              | GDM                  |
| 20-21 GW | 1 (ref.)                                         | 1.624 (0.581, 4.536) |
| 21-22 GW | 1 (ref.)                                         | 1.731 (1.081, 2.772) |
| 22-23 GW | 1 (ref.)                                         | 1.474 (0.923, 2.353) |
| 23-24 GW | 1 (ref.)                                         | 0.999 (0.404, 2.474) |

FAO, fetal abdominal obesity; FAOR, fetal abdominal overgrowth ratio; GA-AC, estimated gestational age by abdominal circumference; GA-LMP, gestational age by last menstruation period; GW, gestational week; NGT, normal glucose tolerance; GDM, gestational diabetes mellitus.

Supplementary Table S4. Correlation of FAORs measured at 20-24 GW with FAORs measured at the time of diagnosis of GDM

| <b>FAORs</b>                    | <b>Variables</b>                 | <b>Correlation Coefficient</b> | <b>p-value</b> |
|---------------------------------|----------------------------------|--------------------------------|----------------|
| GA-AC / GA-LMP<br>- at 20-24GW  | GA-AC / GA-LMP<br>- at diagnosis | 0.4348                         | <0.0001        |
| GA-AC / GA-BPD<br>- at 20-24 GW | GA-AC / GA-BPD<br>- at diagnosis | 0.3054                         | <0.0001        |
| GA-AC / GA-FL<br>- at 20-24 GW  | GA-AC / GA-FL<br>- at diagnosis  | 0.2839                         | <0.0001        |

FAOR, fetal abdominal overgrowth ratio; GW, gestational week; GDM, gestational diabetes mellitus; GA-AC, estimated gestational age by abdominal circumference; GA-LMP, gestational age by last menstruation period; GA-BPD, estimated gestational age by biparietal diameter; GA-FL, estimated gestational age by femur length.

Fig. S1. Measurement of fetal biparietal diameter, femur length, and abdominal circumference by ultrasonography and conversion to estimated gestational age

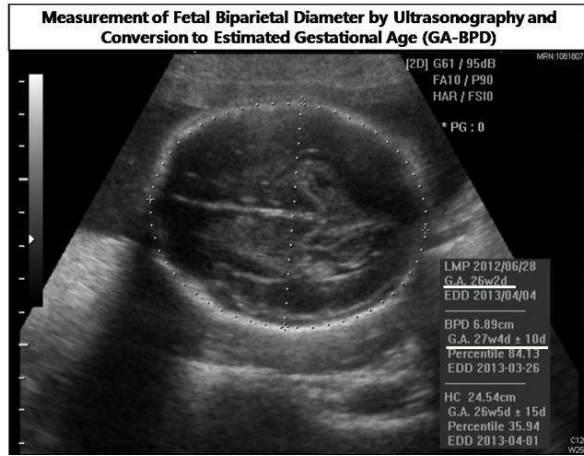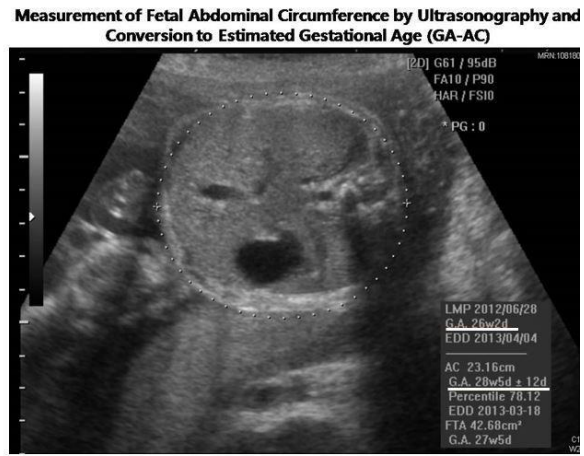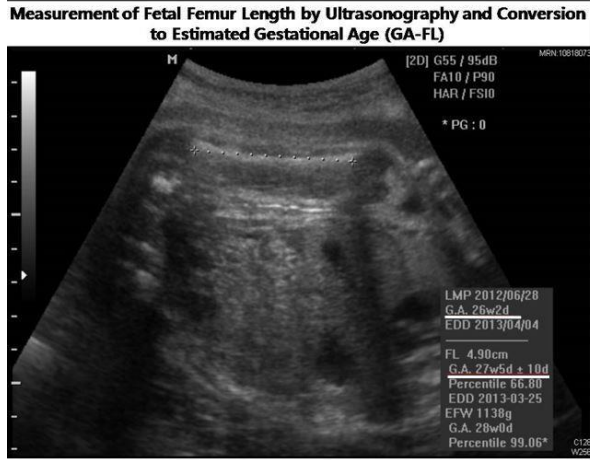

**OB Report** Page 1/1 09:12:42 am 2012-05-29

Institution CHA Gangnam Medical Center Diag. Physician Name  
ID  
Age 37y10m

LMP 2012-06-28 Estab. Due Date  
GA(LMP) 26w2d Average US GA 27w5d  
EDD(LMP) 2013-04-04 EDD(Average US GA) 2013-03-25  
EFW Shinozuka1 1138g GA(EFW) 28w0d  
Percentile(EFW) 99.06\* SD(EFW) +2.35\*

| Fetal Biometry | 1         | 2     | 3 | Avg.  | G.A.           | Percent |
|----------------|-----------|-------|---|-------|----------------|---------|
| <u>BPD</u>     | Shinozuka | 6.89  |   | 6.89  | cm 27w4d ± 10d | 84.13   |
| <u>HC</u>      | Hadlock   | 24.54 |   | 24.54 | cm 26w5d ± 15d | 35.94   |
| <u>AC</u>      | Shinozuka | 23.16 |   | 23.16 | cm 28w5d ± 12d | 78.12   |
| <u>FL</u>      | Shinozuka | 4.90  |   | 4.90  | cm 27w5d ± 10d | 66.80   |
| <u>FTA</u>     | Osaka     |       |   | 42.68 | cm² 27w5d      |         |

| Calc   |        | % |              |
|--------|--------|---|--------------|
| FL/AC  | 21.16  | % | (20 - 24*)   |
| FL/BPD | 71.12  | % | (71 - 87*)   |
| FL/HC  | 19.97  | % |              |
| HC/AC  | 105.96 | % | (104 - 122*) |

Edit Comment Graph PgUp PgDn Print Exit
